# Supplementary material for: Data mining for vortices on the Earth's magnetosphere – algorithm application for detection and analysis
Source: Copernicus journal article supplement (doi:10.5194/angeo-36-1117-2018), 2018-08-16
Supplement: Supplementary file 1 [file angeo-36-1117-2018-supplement.zip]

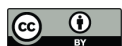

## *Supplement of*

# **Data mining for vortices on the Earth's magnetosphere – algorithm application for detection and analysis**

**Yaireska M. Collado-Vega et al.**

*Correspondence to:* Yaireska M. Collado-Vega ([yaireska.m.colladovega@nasa.gov](mailto:yaireska.m.colladovega@nasa.gov))

- [angeo-36-1117-2018-supplement-title-page.pdf](#)
- [velocitystreamslinessamescale.mpg](#)

The copyright of individual parts of the supplement might differ from the CC BY 4.0 License.
